# Supplementary material
Source: publisher figshare collection journal article supplement (https://springernature.figshare.com/ndownloader/files/17245742)
Supplement: Supplementary file [file 17245742]

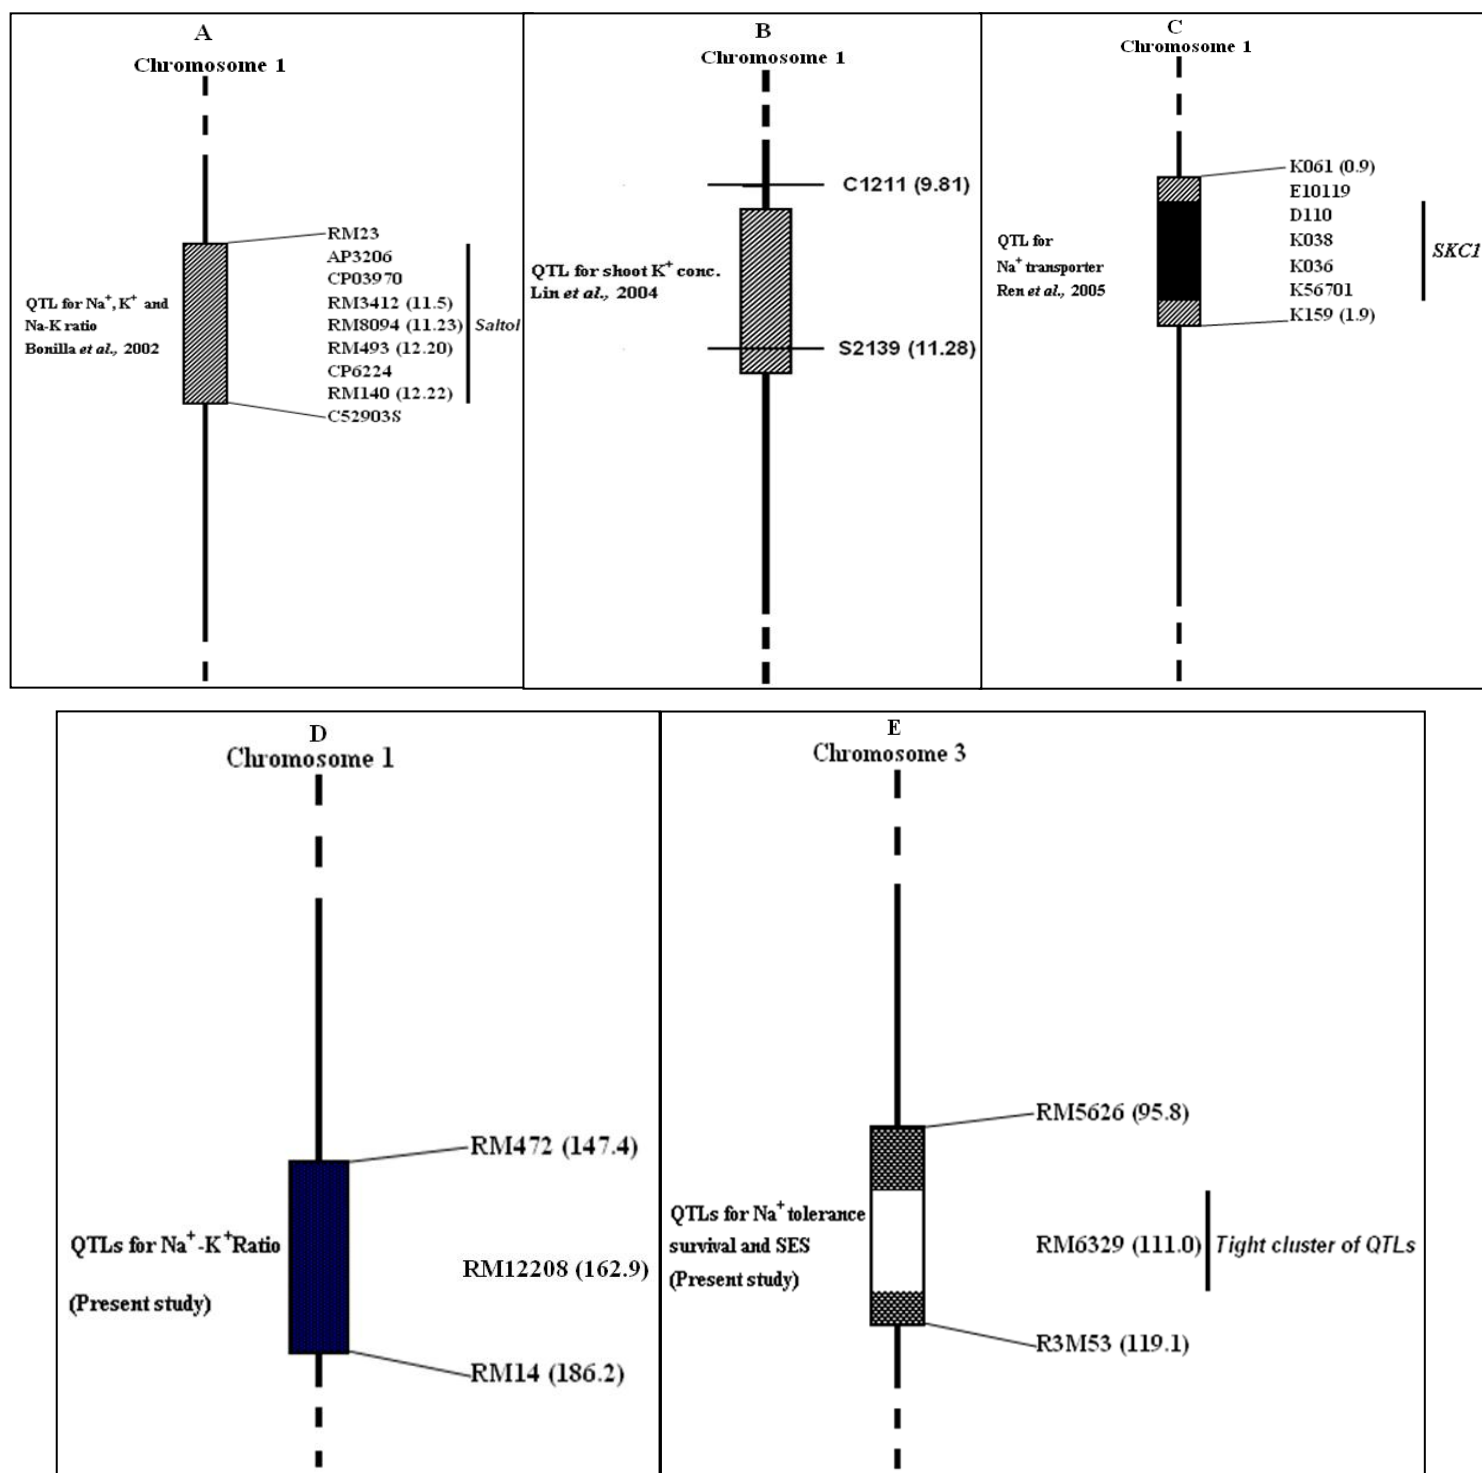

Additional file 7: Figure S2: Summary of three major loci identified in this study. A, B, and C refer to the *Saltol* region on the short arm of chromosome 1, which was also identified before (Bonilla *et al.* 2002; Lin *et al.* 2004; Ren *et al.* 2005), whereas D and E represent two novel genomic regions identified in this study on the long arms of chromosome 1 and 3, respectively.
